# Supplementary material
Source: publisher figshare collection journal article supplement (https://future-science-group.figshare.com/articles/dataset/_/22829111)

**A**

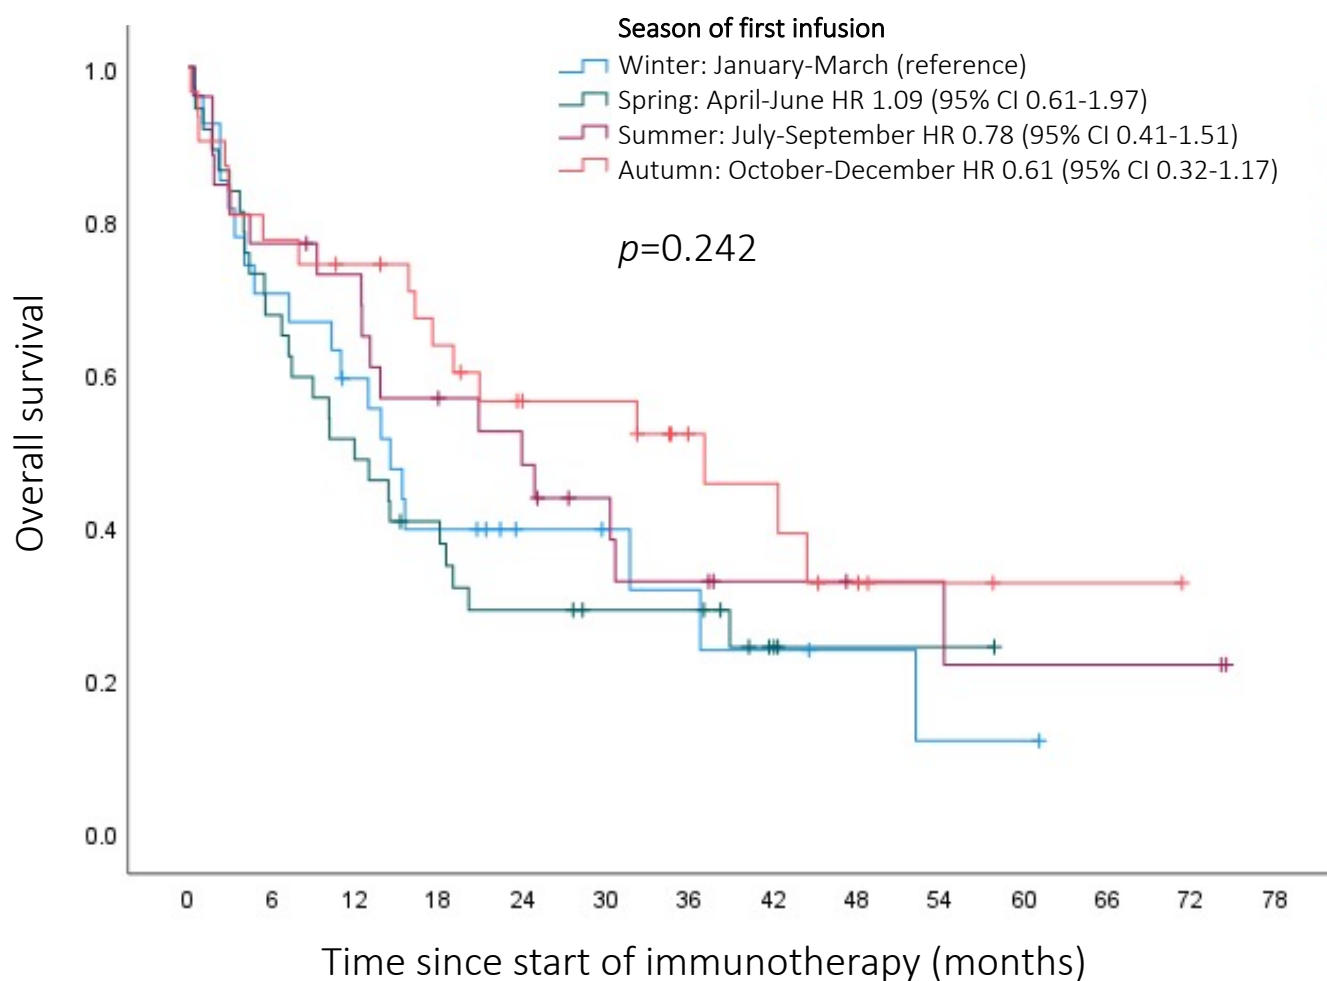Number at risk

|        |    |    |    |    |    |    |   |   |   |   |   |   |   |   |
|--------|----|----|----|----|----|----|---|---|---|---|---|---|---|---|
| Winter | 27 | 19 | 15 | 10 | 6  | 5  | 4 | 3 | 2 | 1 | 1 |   |   |   |
| Spring | 37 | 25 | 18 | 14 | 10 | 8  | 8 | 3 | 1 | 1 |   |   |   |   |
| Summer | 26 | 20 | 18 | 13 | 11 | 8  | 6 | 4 | 3 | 3 | 2 | 2 | 2 | 2 |
| Autumn | 31 | 24 | 22 | 18 | 13 | 13 | 8 | 7 | 4 | 2 | 1 | 1 | 1 | 1 |

# B

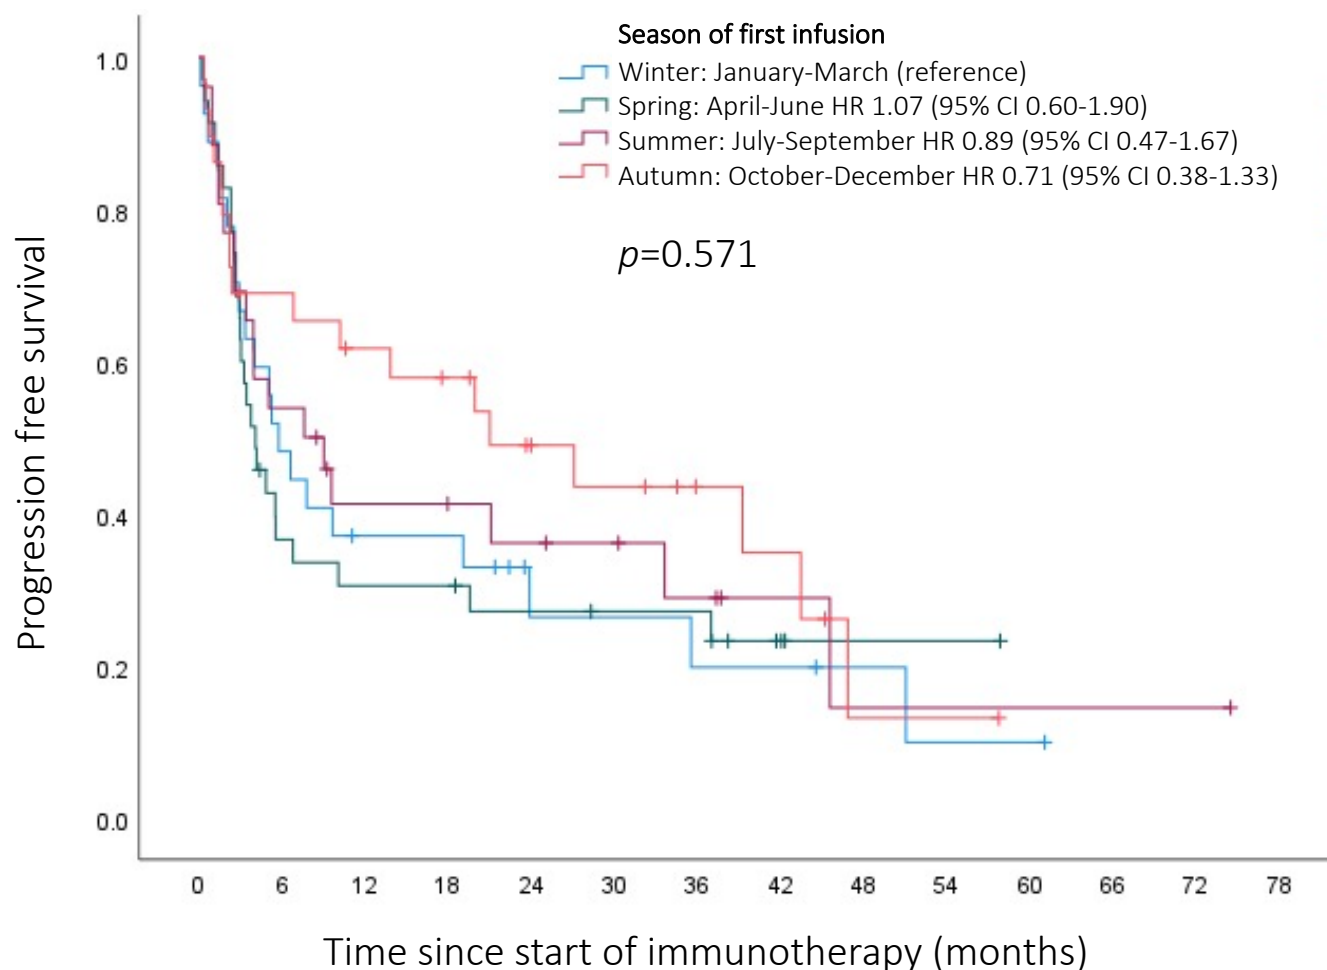Number at risk

|        |    |    |    |    |   |   |   |   |   |   |   |   |   |   |
|--------|----|----|----|----|---|---|---|---|---|---|---|---|---|---|
| Winter | 27 | 13 | 9  | 9  | 4 | 4 | 3 | 3 | 2 | 1 | 1 |   |   |   |
| Spring | 35 | 12 | 10 | 10 | 8 | 7 | 7 | 3 | 1 | 1 |   |   |   |   |
| Summer | 26 | 14 | 9  | 8  | 7 | 6 | 4 | 2 | 1 | 1 | 1 | 1 | 1 | 1 |
| Autumn | 29 | 19 | 16 | 14 | 9 | 8 | 5 | 4 | 1 | 1 |   |   |   |   |

Supplement: Supplementary file 1 [file 1]

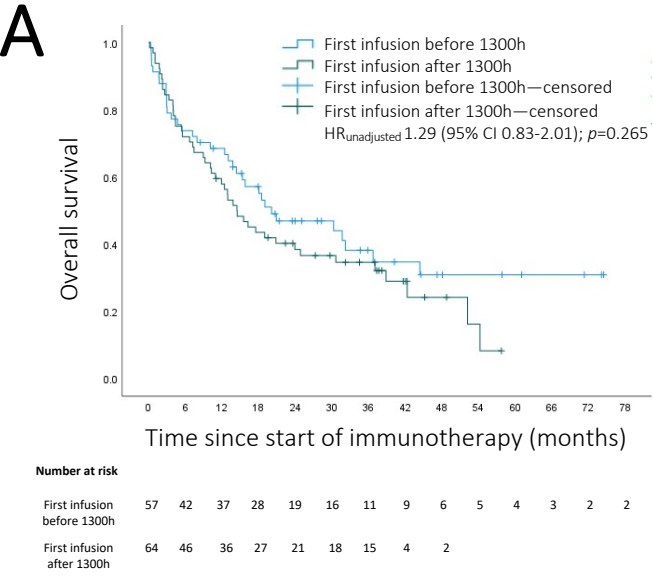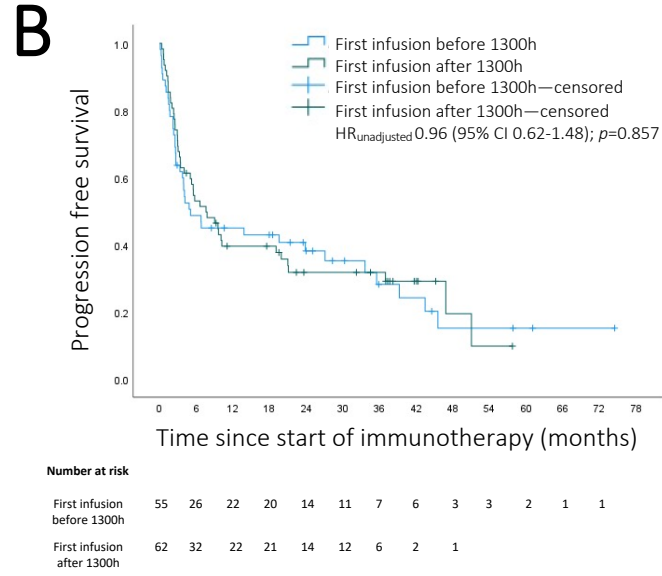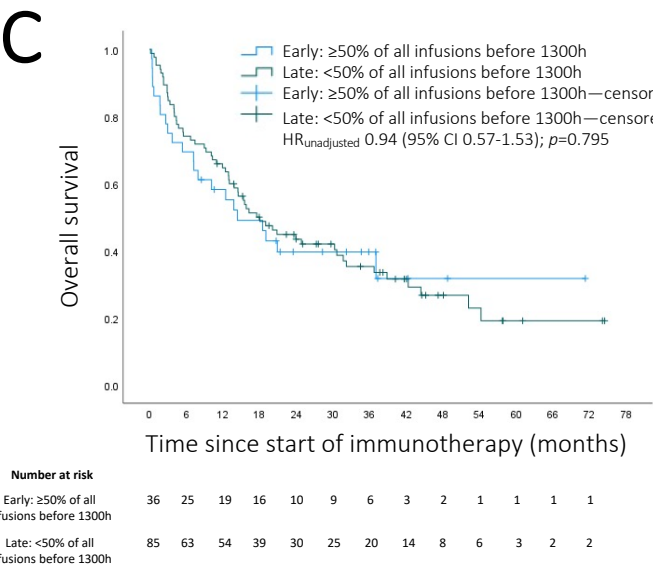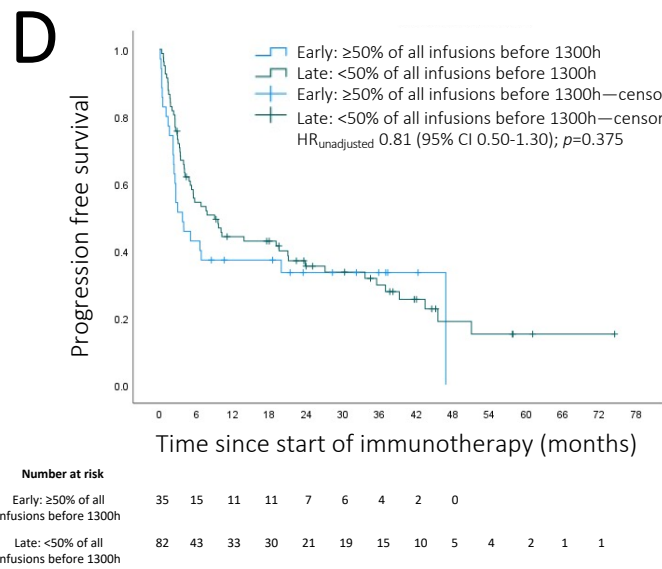

Supplement: Supplementary file 2 [file 1]
